# Supplementary material
Source: PubMed Central journal article supplement (PMC4523239)
Supplement: NIHMS708846-supplement-Supplement.pdf [file NIHMS708846-supplement-Supplement.pdf]

# **SUPPLEMENTARY MATERIALS**

## **Metaplastic breast carcinomas display genomic and transcriptomic heterogeneity**

Weigelt et al.

Supplementary Figures S1 and S2

Supplementary Tables S1-S3

## Supplementary Figure S1

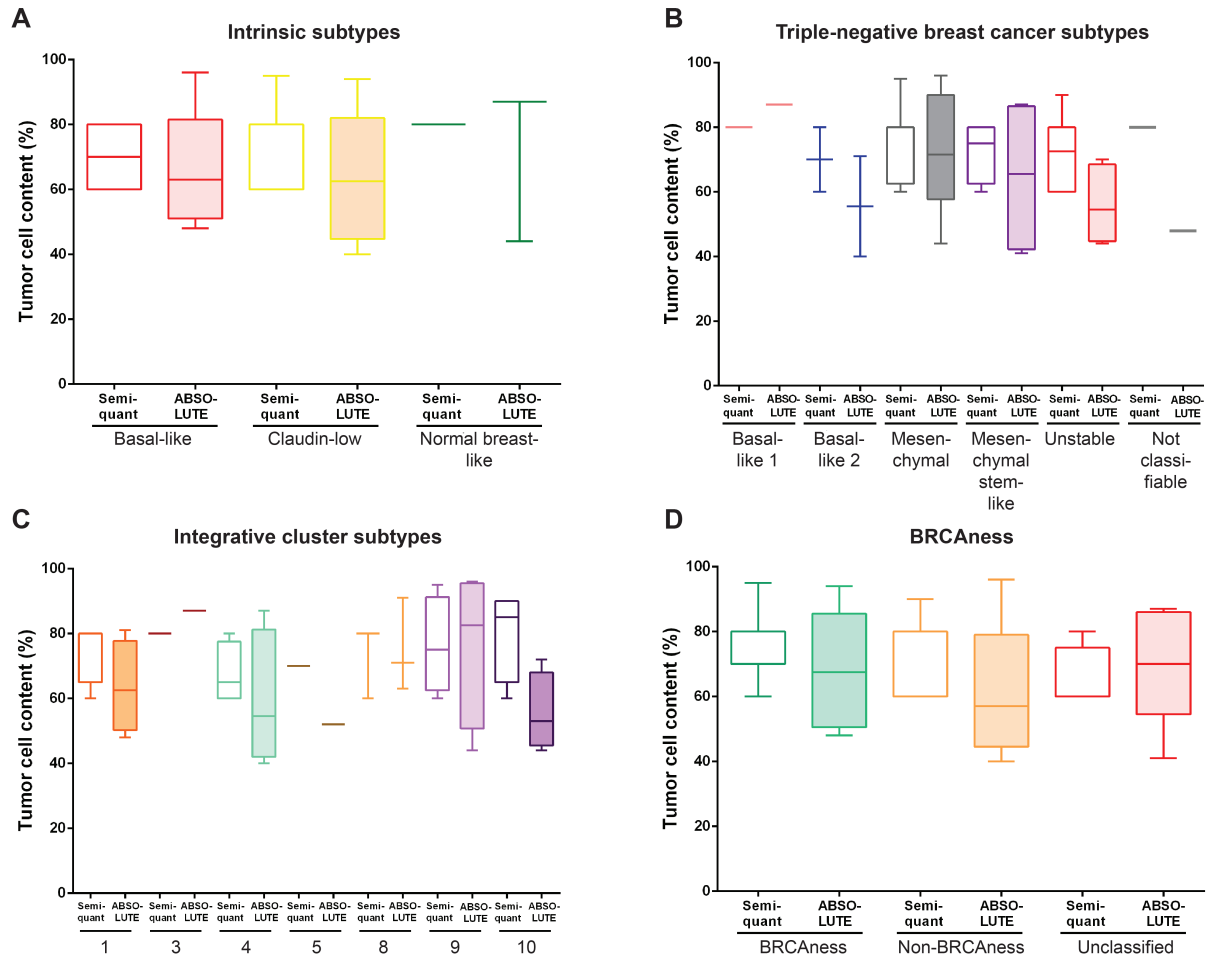

**Supplementary Figure S1. Tumor cellularity in distinct molecular subtypes of metaplastic breast cancers as determined by semi-quantitative histologic assessment and ABSOLUTE.** (A) PAM50 intrinsic molecular subtypes, (B) Triple-negative breast cancer subtypes, (C) Integrative cluster subtypes, and (D) BRCAness subtypes.

## Supplementary Figure S2

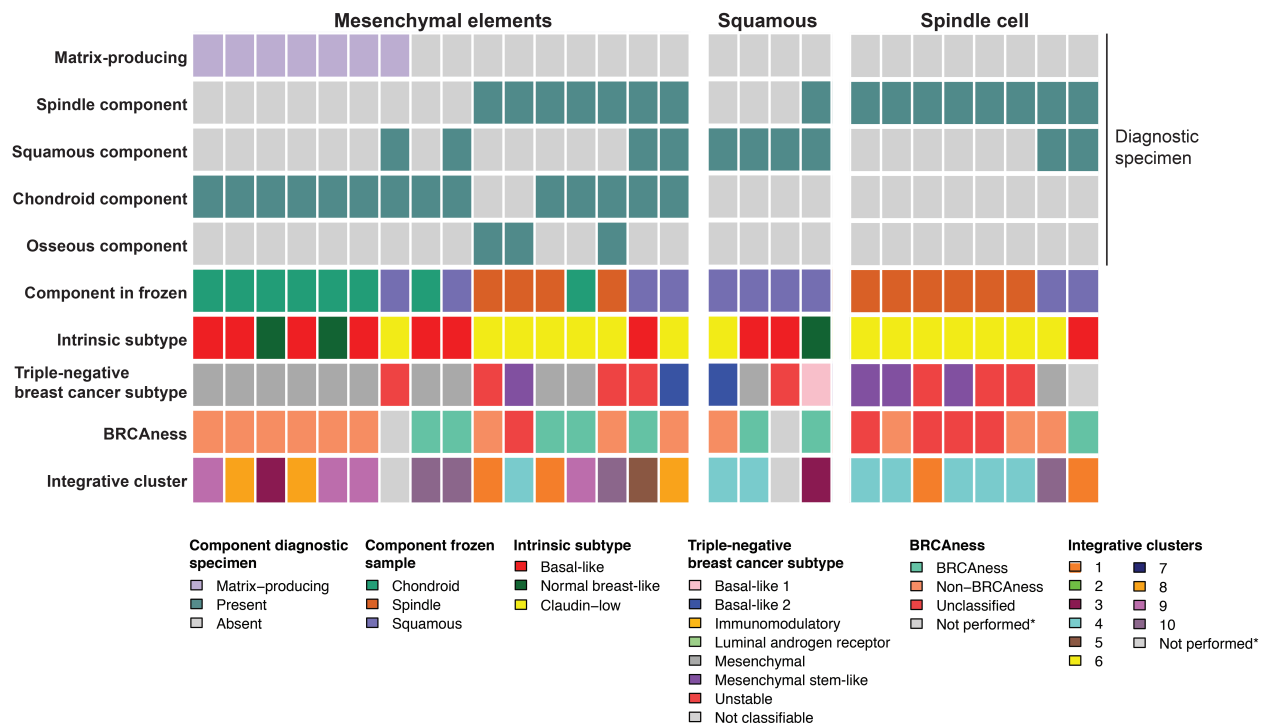

### Supplementary Figure S2. Molecular subtypes of 28 metaplastic breast cancers according to the histologic assessment of the diagnostic material.

Classification of metaplastic breast cancers according to diagnosis and metaplastic components present in the frozen sample subjected to molecular profiling. The PAM50 intrinsic molecular subtype, triple-negative breast cancer subtype, BRCAness signature and integrative cluster for each case is shown. \*For two cases, no SNP6 data were available; hence, integrative cluster and BRCAness analysis could not be performed.

**Supplementary Table S1.** Metaplastic breast cancers subjected to gene copy number and gene expression profiling and results of molecular subtyping.

| Sample ID | Component in frozen sample | SNP6 gene copy number profiling | HT12 gene expression profiling | PAM50/ claudin-low subtype | Triple-negative breast cancer subtype | BRCAness      | Integrative cluster |
|-----------|----------------------------|---------------------------------|--------------------------------|----------------------------|---------------------------------------|---------------|---------------------|
| META30    | Chondroid                  | Yes                             | Yes                            | Basal-like                 | Mesenchymal-like                      | Non-BRCAness  | 9                   |
| META31    | Chondroid                  | Yes                             | Yes                            | Basal-like                 | Mesenchymal-like                      | Non-BRCAness  | 8                   |
| META32    | Spindle                    | Yes                             | Yes                            | Claudin-low                | Unstable                              | Non-BRCAness  | 1                   |
| META33    | Chondroid                  | Yes                             | Yes                            | Basal-like                 | Mesenchymal-like                      | BRCAness      | 10                  |
| META34    | Squamous                   | Yes                             | Yes                            | Claudin-low                | Basal-like 2                          | Non-BRCAness  | 4                   |
| META36    | Chondroid                  | Yes                             | Yes                            | Normal breast-like         | Mesenchymal-like                      | Non-BRCAness  | 3                   |
| META37    | Squamous                   | Yes                             | Yes                            | Normal breast-like         | Basal-like 1                          | BRCAness      | 3                   |
| META39    | Spindle                    | Yes                             | Yes                            | Claudin-low                | Mesenchymal-like                      | BRCAness      | 1                   |
| META40    | Squamous                   | Yes                             | Yes                            | Claudin-low                | Mesenchymal-like                      | Non-BRCAness  | 10                  |
| META41    | Squamous                   | Yes                             | Yes                            | Basal-like                 | Mesenchymal-like                      | BRCAness      | 10                  |
| META42    | Squamous                   | Yes                             | Yes                            | Basal-like                 | Mesenchymal-like                      | BRCAness      | 4                   |
| META43    | Squamous                   | Yes                             | Yes                            | Basal-like                 | Unstable                              | BRCAness      | 5                   |
| META44    | Squamous                   | No                              | Yes                            | Claudin-low                | Unstable                              | Not analyzed* | Not analyzed*       |
| META45    | Squamous                   | Yes                             | Yes                            | Basal-like                 | Not classifiable                      | BRCAness      | 1                   |
| META46    | Squamous                   | No                              | Yes                            | Basal-like                 | Unstable                              | Not analyzed* | Not analyzed*       |
| META47    | Spindle                    | Yes                             | Yes                            | Claudin-low                | Mesenchymal stem-like                 | Unclassified  | 4                   |
| META49    | Spindle                    | Yes                             | Yes                            | Claudin-low                | Mesenchymal stem-like                 | Non-BRCAness  | 4                   |
| META52    | Chondroid                  | Yes                             | Yes                            | Claudin-low                | Mesenchymal-like                      | BRCAness      | 9                   |
| META53    | Chondroid                  | Yes                             | Yes                            | Basal-like                 | Mesenchymal-like                      | Non-BRCAness  | 8                   |
| META55    | Chondroid                  | Yes                             | Yes                            | Normal breast-like         | Mesenchymal-like                      | Non-BRCAness  | 9                   |
| META56    | Spindle                    | Yes                             | Yes                            | Claudin-low                | Unstable                              | Unclassified  | 1                   |
| META57    | Spindle                    | Yes                             | Yes                            | Claudin-low                | Mesenchymal stem-like                 | Unclassified  | 4                   |
| META58    | Spindle                    | Yes                             | Yes                            | Claudin-low                | Mesenchymal stem-like                 | Unclassified  | 4                   |
| META59    | Spindle                    | Yes                             | Yes                            | Claudin-low                | Unstable                              | Non-BRCAness  | 10                  |
| META60    | Spindle                    | Yes                             | Yes                            | Claudin-low                | Unstable                              | Unclassified  | 4                   |
| META62    | Squamous                   | Yes                             | Yes                            | Claudin-low                | Basal-like 2                          | Non-BRCAness  | 8                   |
| META64    | Chondroid                  | Yes                             | Yes                            | Basal-like                 | Mesenchymal-like                      | Non-BRCAness  | 9                   |
| META65    | Spindle                    | Yes                             | Yes                            | Claudin-low                | Unstable                              | Non-BRCAness  | 4                   |

\*: No SNP6 data available.

**Supplementary Table S2.** Assignment of 997 breast cancers of the METABRIC discovery cohort to the PAM50 molecular and integrative cluster subtypes using the methods described in this manuscript, and agreement with PAM50 molecular and integrative cluster subtypes of the same cases as published by Curtis et al, Nature 2012.

|                                                                                           |                    | Applied approach for PAM50 molecular subtyping of METABRIC discovery set in current study |      |           |           |                    |
|-------------------------------------------------------------------------------------------|--------------------|-------------------------------------------------------------------------------------------|------|-----------|-----------|--------------------|
|                                                                                           |                    | Basal-like                                                                                | HER2 | Luminal A | Luminal B | Normal breast-like |
| PAM50 molecular subtypes of METABRIC discovery set published by Curtis et al, Nature 2012 | Basal-like         | 115                                                                                       | 2    | 0         | 0         | 1                  |
|                                                                                           | HER2               | 0                                                                                         | 87   | 0         | 0         | 0                  |
|                                                                                           | Luminal A          | 0                                                                                         | 0    | 451       | 14        | 1                  |
|                                                                                           | Luminal B          | 0                                                                                         | 4    | 8         | 256       | 0                  |
|                                                                                           | Normal breast-like | 0                                                                                         | 2    | 8         | 0         | 48                 |
|                                                                                           |                    |                                                                                           |      |           | 997       |                    |

Rand index=0.955  
Kappa=0.941

|                                                                                               |             | Integrative cluster (IntClust) subtypes of METABRIC discovery set published by Curtis et al, Nature 2012 |            |            |            |            |            |            |            |            |             |
|-----------------------------------------------------------------------------------------------|-------------|----------------------------------------------------------------------------------------------------------|------------|------------|------------|------------|------------|------------|------------|------------|-------------|
|                                                                                               |             | IntClust 1                                                                                               | IntClust 2 | IntClust 3 | IntClust 4 | IntClust 5 | IntClust 6 | IntClust 7 | IntClust 8 | IntClust 9 | IntClust 10 |
| Applied approach for integrative cluster subtyping of METABRIC discovery set in current study | IntClust 1  | 68                                                                                                       | 3          | 3          | 5          | 1          | 0          | 3          | 0          | 2          | 1           |
|                                                                                               | IntClust 2  | 0                                                                                                        | 37         | 3          | 2          | 0          | 0          | 0          | 0          | 0          | 0           |
|                                                                                               | IntClust 3  | 1                                                                                                        | 0          | 115        | 4          | 1          | 0          | 2          | 13         | 0          | 1           |
|                                                                                               | IntClust 4  | 0                                                                                                        | 2          | 2          | 120        | 1          | 0          | 0          | 0          | 1          | 0           |
|                                                                                               | IntClust 5  | 1                                                                                                        | 0          | 0          | 4          | 78         | 0          | 1          | 0          | 1          | 0           |
|                                                                                               | IntClust 6  | 0                                                                                                        | 0          | 1          | 4          | 0          | 39         | 2          | 0          | 0          | 0           |
|                                                                                               | IntClust 7  | 1                                                                                                        | 2          | 0          | 11         | 0          | 0          | 93         | 2          | 2          | 0           |
|                                                                                               | IntClust 8  | 0                                                                                                        | 0          | 26         | 0          | 1          | 1          | 2          | 126        | 0          | 0           |
|                                                                                               | IntClust 9  | 1                                                                                                        | 1          | 2          | 5          | 5          | 4          | 4          | 1          | 54         | 0           |
|                                                                                               | IntClust 10 | 4                                                                                                        | 0          | 4          | 12         | 7          | 0          | 2          | 1          | 7          | 94          |
|                                                                                               |             |                                                                                                          |            |            |            |            |            |            |            | 997        |             |

Rand index=0.93  
Kappa=0.804

**Supplementary Table S3.** Results of the classification of 28 metaplastic breast cancers into intrinsic molecular subtypes, triple-negative breast cancer subtypes, integrative clusters and BRCAness.

|                       |             | Integrative cluster |   |   |   |   |   |    | Triple-negative breast cancer subtype |              |                  |                       |          |                  | BRCAness signature |              |              |   |
|-----------------------|-------------|---------------------|---|---|---|---|---|----|---------------------------------------|--------------|------------------|-----------------------|----------|------------------|--------------------|--------------|--------------|---|
|                       |             | 1                   | 3 | 4 | 5 | 8 | 9 | 10 | Basal-like 1                          | Basal-like 2 | Mesenchymal-like | Mesenchymal stem-like | Unstable | Not classifiable | BRCAness           | Non-BRCAness | Unclassified |   |
| PAM50/<br>claudin-low | Basal-like  | 1                   |   | 1 | 1 | 2 | 2 | 2  |                                       |              | 7                |                       |          | 2                | 1                  | 5            | 4            |   |
|                       | Normal      |                     | 2 |   |   |   | 1 |    | 1                                     |              | 2                |                       |          |                  | 1                  | 2            |              |   |
|                       | Claudin-low | 3                   |   | 7 |   | 1 | 1 | 2  |                                       | 2            | 3                | 4                     |          | 6                |                    | 2            | 7            | 5 |

|                       |              | Integrative cluster |   |   |   |   |   |    | Triple-negative breast cancer subtype |              |                  |                       |          |     |   |
|-----------------------|--------------|---------------------|---|---|---|---|---|----|---------------------------------------|--------------|------------------|-----------------------|----------|-----|---|
|                       |              | 1                   | 3 | 4 | 5 | 8 | 9 | 10 | Basal-like 1                          | Basal-like 2 | Mesenchymal-like | Mesenchymal stem-like | Unstable | N/A |   |
| BRCAness<br>signature | BRCAness     | 2                   | 1 | 1 | 1 |   | 1 | 2  | 1                                     |              | 5                |                       |          | 1   | 1 |
|                       | Non-BRCAness | 1                   | 1 | 3 |   | 3 | 3 | 2  |                                       | 2            | 7                | 1                     |          | 3   |   |
|                       | Unclassified | 1                   |   | 4 |   |   |   |    |                                       |              |                  | 3                     |          | 2   |   |

|                                          |                       | Integrative cluster |   |   |   |   |   |    |
|------------------------------------------|-----------------------|---------------------|---|---|---|---|---|----|
|                                          |                       | 1                   | 3 | 4 | 5 | 8 | 9 | 10 |
| Triple-negative breast<br>cancer subtype | Basal-like 1          |                     | 1 |   |   |   |   |    |
|                                          | Basal-like 2          |                     |   | 1 |   | 1 |   |    |
|                                          | Mesenchymal-like      | 1                   | 1 | 1 |   | 2 | 4 | 3  |
|                                          | Mesenchymal stem-like |                     |   | 4 |   |   |   |    |
|                                          | Unstable              | 2                   |   | 2 | 1 |   |   | 1  |
|                                          | Not classifiable      | 1                   |   |   |   |   |   |    |
